# Supplementary figures and images for: Detecting Gene Rearrangements in Patient Populations Through a 2-Step Diagnostic Test Comprised of Rapid IHC Enrichment Followed by Sensitive Next-Generation Sequencing
Source: PubMed Central journal article supplement — Appl Immunohistochem Mol Morphol. 2016 Mar 29;25(7):513–23. doi: 10.1097/PAI.0000000000000360 (PMC5553231; doi:10.1097/pai.0000000000000360), 2016-03-29

Supplemental Digital Content 1

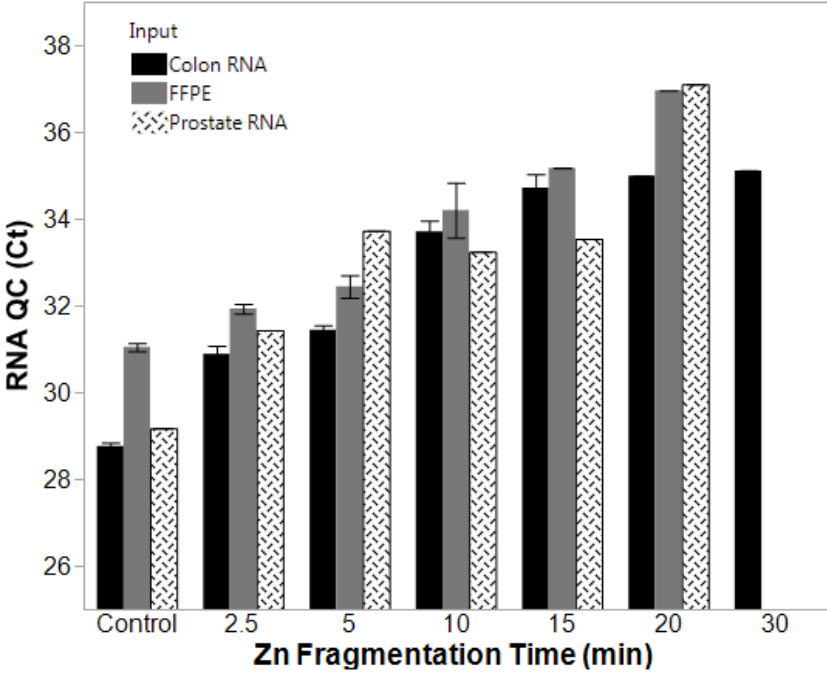

Supplement: pai-25-513-s001.pdf [file pai-25-513-s001.pdf]
